# Supplementary material for: Doubly ionized OCS bond rearrangement upon fragmentation – experiment and theory
Source: Royal Society of Chemistry journal article supplement (doi:10.1039/d3cp01688a), 2023-01-01
Supplement: d3cp01688a1.pdf [file d3cp01688a1.pdf]

## Supplementary Material

### Doubly ionized OCS bond rearrangement upon fragmentation - experiment and theory

**Mahmoud Jarraya,<sup>a,b,c</sup> Måns Wallner,<sup>d</sup> Saida Ben Yaghlane,<sup>b</sup> Emelie Olsson,<sup>d</sup> Veronica Ideböhn,<sup>d</sup>  
Richard J. Squibb,<sup>d</sup> Jérôme Palaudoux,<sup>c</sup> Gunnar Nyman,<sup>c</sup> Muneerah Mogren Al-Mogren,<sup>f</sup> John H.  
D. Eland,<sup>g,\*</sup> Raimund Feifel,<sup>d,\*</sup> Majdi Hochlaf<sup>a,\*</sup>**

<sup>a</sup> Université Gustave Eiffel, COSYS/IMSE, 5 Bd Descartes, 77454, Champs Sur Marne, France

<sup>b</sup> LSAMA, Faculté des Sciences de Tunis, Université de Tunis El Manar, Tunis, 2092, Tunisie

<sup>c</sup> LCP-MR, Sorbonne Université – UMR7614, 75231 Paris Cedex 05, France

<sup>d</sup> Department of Physics, University of Gothenburg, 412 58 Gothenburg, Sweden

<sup>e</sup> Department of Chemistry and Molecular Biology, University of Gothenburg, Gothenburg, 405 30, Sweden

<sup>f</sup> Department of Chemistry, College of Sciences, King Saud University, PO Box 2455, Riyadh 11451, Saudi Arabia

<sup>g</sup> Department of Chemistry, Physical and Theoretical Chemistry Laboratory, Oxford University, Oxford, OX1 3QZ, UK

**Table S1:** Optimized structural parameters ( $R_i$  in bohr and  $\theta$  in degree), harmonic frequencies ( $\omega_i$ , in  $\text{cm}^{-1}$ ) and zero point vibrational energies (ZPE, in  $\text{cm}^{-1}$ ) and total energies (E, in Hartree) of the molecular species involved in this work as computed at the RCCSD(T)/aug-cc-pV(Q+d)Z level of theory.

|                                     | $R_1$ | $R_2$ | $\theta$ | $\omega_1$ | $\omega_2$ | $\omega_3$ | $\omega_4$ | ZPE     | E            |
|-------------------------------------|-------|-------|----------|------------|------------|------------|------------|---------|--------------|
| O ( $^3P_g$ )                       |       |       |          |            |            |            |            |         | -74.99493065 |
| O <sup>+</sup> ( $^4S_u$ )          |       |       |          |            |            |            |            |         | -74.49819755 |
| C ( $^3P_g$ )                       |       |       |          |            |            |            |            |         | -37.78663526 |
| C <sup>+</sup> ( $^2P_u$ )          |       |       |          |            |            |            |            |         | -37.37490089 |
| C <sup>2+</sup> ( $^1S_g$ )         |       |       |          |            |            |            |            |         | -36.48289644 |
| S ( $^3P_g$ )                       |       |       |          |            |            |            |            |         | -397.6682818 |
| S <sup>+</sup> ( $^4S_u$ )          |       |       |          |            |            |            |            |         | -397.2911828 |
| S <sup>2+</sup> ( $^3P_g$ )         |       |       |          |            |            |            |            |         | -396.4330943 |
| CO ( $X^1\Sigma^+$ )                | 2.139 |       |          | 2159.33    |            |            |            | 1079.65 | -113.1903709 |
| CO <sup>+</sup> ( $X^2\Sigma^+$ )   | 2.113 |       |          | 2210.47    |            |            |            | 1105.22 | -112.6761715 |
| CO <sup>2+</sup> ( $X^3\Pi$ )       | 2.353 |       |          | 1461.56    |            |            |            | 730.77  | -111.6752489 |
| CS ( $X^1\Sigma^+$ )                | 2.913 |       |          | 1279.47    |            |            |            | 639.724 | -435.7239201 |
| CS <sup>+</sup> ( $X^2\Sigma^+$ )   | 2.830 |       |          | 1376.32    |            |            |            | 688.148 | -435.3077480 |
| CS <sup>2+</sup> ( $X^3\Pi$ )       | 3.034 |       |          | 1035.02    |            |            |            | 517.5   | -434.5201976 |
| SO ( $X^3\Sigma^-$ )                | 2.808 |       |          | 1154.97    |            |            |            | 577.475 | -472.8595007 |
| SO <sup>+</sup> ( $X^2\Pi$ )        | 2.701 |       |          | 1321.98    |            |            |            | 660.982 | -472.4812456 |
| SO <sup>2+</sup> ( $X^1\Sigma^+$ )  | 2.627 |       |          | 1428.75    |            |            |            | 714.366 | -471.7691414 |
| OCS ( $X^1\Sigma^+$ )               | 2.190 | 2.961 | 180.0    | 2088.52    | 872.54     | 523.75     | 523.75     | 2004.24 | -510.9766309 |
| OCS <sup>2+</sup> ( $X^3\Sigma^-$ ) | 2.112 | 3.388 | 180.0    | 2239.98    | 527.17     | 326.61     | 326.61     | 1710.16 | -509.8749955 |
| OCS <sup>2+</sup> ( $a^1\Delta$ )   | 2.120 | 3.325 | 180.0    | 2150.31    | 530.60     | 362.35     | 306.82     | 1675.02 | -509.8227512 |
| COS <sup>2+</sup> ( $X^3\Sigma^-$ ) | 2.288 | 3.172 | 180.0    | 1622.74    | 584.01     | 137.56     | 137.56     | 1240.92 | -509.8030516 |
| COS <sup>2+</sup> ( $a^1\Delta$ )   | 2.304 | 3.125 | 180.0    | 1540.63    | 605.60     | 151.45     | 149.83     | 1223.74 | -509.7515190 |
| COS <sup>2+</sup> ( $1^1A''$ )      | 2.576 | 3.734 | 53.92    | 1054.17    | 709.66     | 328.97     |            | 1046.39 | -509.7299407 |
| COS <sup>2+</sup> ( $1^5\Pi$ )      | 2.369 | 3.040 | 180.0    | 1599.40    | 702.01     | 131.45     | 131.21     | 1216.29 | -509.6369265 |

**Table S2:** Dissociation energies (E, eV) of  $\text{COS}^{2+}$  leading to  $[\text{SO}+\text{C}]^{2+}$  fragments laying in the 30 - 40 eV with respect to  $\text{OCS} (\text{X}^1\Sigma^+)$ . For  $\text{SO}^+$  and  $\text{SO}^{2+}$ , we used the excitation energies from Refs. <sup>1,2</sup>. We also used the data in Table S1 and from Ref. <sup>3</sup>.

|                 | Dissociation channel                                            | E      |
|-----------------|-----------------------------------------------------------------|--------|
| L <sub>1</sub>  | $\text{SO}^+ (\text{X}^2\Pi) + \text{C}^+ (^2\text{P}_u)$       | 30.396 |
| L <sub>2</sub>  | $\text{SO}^+ (\text{a}^4\Pi) + \text{C}^+ (^2\text{P}_u)$       | 33.528 |
| L <sub>3</sub>  | $\text{SO}^+ (\text{A}^2\Pi) + \text{C}^+ (^2\text{P}_u)$       | 34.205 |
| L <sub>4</sub>  | $\text{SO}^+ (1^2\Phi) + \text{C}^+ (^2\text{P}_u)$             | 35.094 |
| L <sub>5</sub>  | $\text{SO}^+ (\text{b}^4\Sigma^-) + \text{C}^+ (^2\text{P}_u)$  | 35.117 |
| L <sub>6</sub>  | $\text{SO}^+ (\text{X}^2\Pi) + \text{C}^+ (^4\text{P}_g)$       | 35.728 |
| L <sub>7</sub>  | $\text{SO}^+ (\text{C}^2\Pi) + \text{C}^+ (^2\text{P}_u)$       | 36.044 |
| L <sub>8</sub>  | $\text{SO}^+ (2^4\Pi) + \text{C}^+ (^2\text{P}_u)$              | 36.346 |
| L <sub>9</sub>  | $\text{SO}^+ (1^2\Delta) + \text{C}^+ (^2\text{P}_u)$           | 36.394 |
| L <sub>10</sub> | $\text{SO}^+ (\text{b}^2\Sigma^-) + \text{C}^+ (^2\text{P}_u)$  | 36.569 |
| L <sub>11</sub> | $\text{SO}^+ (1^4\Delta) + \text{C}^+ (^2\text{P}_u)$           | 36.963 |
| L <sub>12</sub> | $\text{SO}^+ (2^2\Sigma^+) + \text{C}^+ (^2\text{P}_u)$         | 36.996 |
| L <sub>13</sub> | $\text{SO}^+ (4^2\Pi) + \text{C}^+ (^2\text{P}_u)$              | 37.347 |
| L <sub>14</sub> | $\text{SO}^{2+} (\text{X}^1\Sigma^+) + \text{C} (^3\text{P}_g)$ | 38.546 |
| L <sub>15</sub> | $\text{SO}^+ (\text{a}^4\Pi) + \text{C}^+ (^4\text{P}_g)$       | 38.860 |
| L <sub>16</sub> | $\text{SO}^+ (\text{A}^2\Pi) + \text{C}^+ (^4\text{P}_g)$       | 39.537 |
| L <sub>17</sub> | $\text{SO}^+ (\text{X}^2\Pi) + \text{C}^+ (^2\text{D}_g)$       | 39.686 |
| L <sub>18</sub> | $\text{SO}^{2+} (\text{X}^1\Sigma^+) + \text{C} (^1\text{D}_g)$ | 39.810 |

**Table S3:** Dissociation energies (E, eV) of  $\text{COS}^{2+}$  leading to  $[\text{CO}+\text{S}]^{2+}$  fragments laying in the 27 - 40 eV with respect to  $\text{OCS} (\text{X}^1\Sigma^+)$ . For  $\text{CO}^+$ , we used the excitation energies from Ref. <sup>4</sup>. We also used the data in Table S1 and from Ref. <sup>3</sup>.

|                 | Dissociation channel                                            | E      |
|-----------------|-----------------------------------------------------------------|--------|
| L <sub>1</sub>  | $\text{CO}^+ (\text{X}^2\Sigma^+) + \text{S}^+ (^4\text{S}_u)$  | 27.425 |
| L <sub>2</sub>  | $\text{CO}^+ (\text{X}^2\Sigma^+) + \text{S}^+ (^2\text{D}_u)$  | 29.267 |
| L <sub>3</sub>  | $\text{CO}^+ (\text{A}^2\Pi) + \text{S}^+ (^4\text{S}_u)$       | 29.987 |
| L <sub>4</sub>  | $\text{CO}^+ (\text{X}^2\Sigma^+) + \text{S}^+ (^2\text{P}_u)$  | 30.466 |
| L <sub>5</sub>  | $\text{CO}^+ (\text{A}^2\Pi) + \text{S}^+ (^2\text{D}_u)$       | 31.829 |
| L <sub>6</sub>  | $\text{CO}^+ (\text{A}^2\Pi) + \text{S}^+ (^2\text{P}_u)$       | 33.028 |
| L <sub>7</sub>  | $\text{CO}^+ (\text{B}^2\Sigma^+) + \text{S}^+ (^4\text{S}_u)$  | 33.146 |
| L <sub>8</sub>  | $\text{CO}^+ (\text{a}^4\Sigma^+) + \text{S}^+ (^4\text{S}_u)$  | 33.214 |
| L <sub>9</sub>  | $\text{CO}^+ (1^4\Delta) + \text{S}^+ (^4\text{S}_u)$           | 34.194 |
| L <sub>10</sub> | $\text{CO}^+ (\text{b}^4\Pi) + \text{S}^+ (^4\text{S}_u)$       | 34.517 |
| L <sub>11</sub> | $\text{CO}^+ (1^4\Sigma^-) + \text{S}^+ (^4\text{S}_u)$         | 34.754 |
| L <sub>12</sub> | $\text{CO}^+ (\text{B}^2\Sigma^+) + \text{S}^+ (^2\text{D}_u)$  | 34.988 |
| L <sub>13</sub> | $\text{CO}^+ (\text{a}^4\Sigma^+) + \text{S}^+ (^2\text{D}_u)$  | 35.056 |
| L <sub>14</sub> | $\text{CO}^+ (\text{C}^2\Delta) + \text{S}^+ (^4\text{S}_u)$    | 35.239 |
| L <sub>15</sub> | $\text{CO}^+ (\text{D}^2\Pi) + \text{S}^+ (^4\text{S}_u)$       | 35.890 |
| L <sub>16</sub> | $\text{CO}^+ (1^4\Delta) + \text{S}^+ (^2\text{D}_u)$           | 36.036 |
| L <sub>17</sub> | $\text{CO}^+ (\text{B}^2\Sigma^+) + \text{S}^+ (^2\text{P}_u)$  | 36.187 |
| L <sub>18</sub> | $\text{CO}^+ (\text{a}^4\Sigma^+) + \text{S}^+ (^2\text{P}_u)$  | 36.255 |
| L <sub>19</sub> | $\text{CO}^+ (\text{b}^4\Pi) + \text{S}^+ (^2\text{D}_u)$       | 36.359 |
| L <sub>20</sub> | $\text{CO}^+ (1^4\Sigma^-) + \text{S}^+ (^2\text{D}_u)$         | 36.596 |
| L <sub>21</sub> | $\text{CO} (\text{X}^1\Sigma^+) + \text{S}^{2+} (^3\text{P}_g)$ | 36.780 |
| L <sub>22</sub> | $\text{CO}^+ (\text{C}^2\Delta) + \text{S}^+ (^2\text{D}_u)$    | 37.081 |
| L <sub>23</sub> | $\text{CO}^+ (1^4\Delta) + \text{S}^+ (^2\text{P}_u)$           | 37.235 |
| L <sub>24</sub> | $\text{CO}^+ (\text{X}^2\Sigma^+) + \text{S}^+ (^4\text{P}_g)$  | 37.269 |
| L <sub>25</sub> | $\text{CO}^+ (\text{b}^4\Pi) + \text{S}^+ (^2\text{P}_u)$       | 37.558 |
| L <sub>26</sub> | $\text{CO}^+ (\text{D}^2\Pi) + \text{S}^+ (^2\text{D}_u)$       | 37.732 |
| L <sub>27</sub> | $\text{CO}^+ (1^4\Sigma^-) + \text{S}^+ (^2\text{P}_u)$         | 37.795 |
| L <sub>28</sub> | $\text{CO} (\text{X}^1\Sigma^+) + \text{S}^{2+} (^1\text{D}_g)$ | 38.184 |
| L <sub>29</sub> | $\text{CO}^+ (\text{C}^2\Delta) + \text{S}^+ (^2\text{P}_u)$    | 38.280 |

|                 |                                                                                                   |        |
|-----------------|---------------------------------------------------------------------------------------------------|--------|
| L <sub>30</sub> | CO <sup>+</sup> (D <sup>2</sup> Π) + S <sup>+</sup> ( <sup>2</sup> P <sub>u</sub> )               | 38.931 |
| L <sub>31</sub> | CO <sup>+</sup> (X <sup>2</sup> Σ <sup>+</sup> ) + S <sup>+</sup> ( <sup>2</sup> D <sub>g</sub> ) | 39.562 |
| L <sub>32</sub> | CO <sup>+</sup> (A <sup>2</sup> Π) + S <sup>+</sup> ( <sup>4</sup> P <sub>g</sub> )               | 39.831 |

**Table S4:** MRCI/aug-cc-pV(Q+d)Z double ionization energies (E, eV) of  $\text{COS}^{2+}$  quoted with respect to the energy at the equilibrium geometry of OCS ( $X^1\Sigma^+$ ) (i.e. OCS angle =  $180^\circ$ , CO distance = 2.190 Bohr and CS distance = 2.961 Bohr ).

| Electronic state | E      |
|------------------|--------|
| $X^3\Sigma^-$    | 32.248 |
| $a^1\Delta$      | 33.407 |
| $b^1\Sigma^+$    | 34.260 |
| $1^3\Pi$         | 35.340 |
| $1^1\Pi$         | 35.634 |
| $1^5\Pi$         | 36.724 |
| $2^3\Pi$         | 37.514 |
| $3^3\Pi$         | 38.255 |
| $1^5\Sigma^-$    | 39.132 |
| $2^1\Pi$         | 39.114 |
| $1^1\Sigma^-$    | 39.232 |
| $2^1\Pi$         | 39.275 |
| $2^3\Sigma^-$    | 39.535 |
| $1^3\Sigma^+$    | 39.371 |
| $1^3\Delta$      | 39.510 |
| $2^1\Delta$      | 39.755 |
| $2^3\Sigma^+$    | 40.458 |

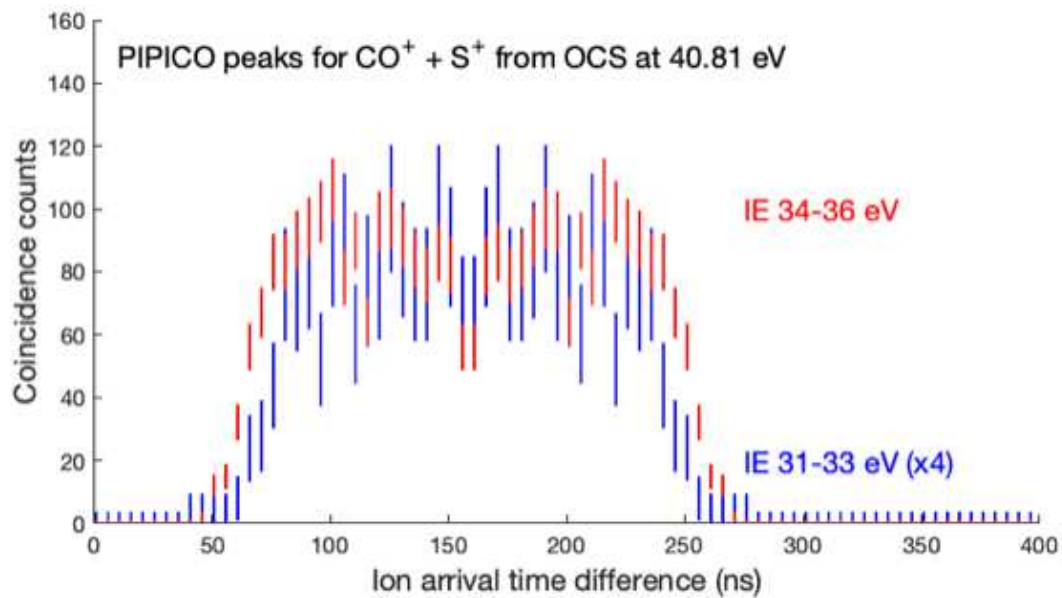

**Figure S1:** Arrival-time difference (PIPICO) peaks for  $\text{CO}^+ + \text{S}^+$  ion pairs coincident with photoelectron pairs signaling double ionization in the energy ranges shown. The peaks have been artificially symmetrized about the time difference for thermal ions, using the later half of each raw PIPICO peak.

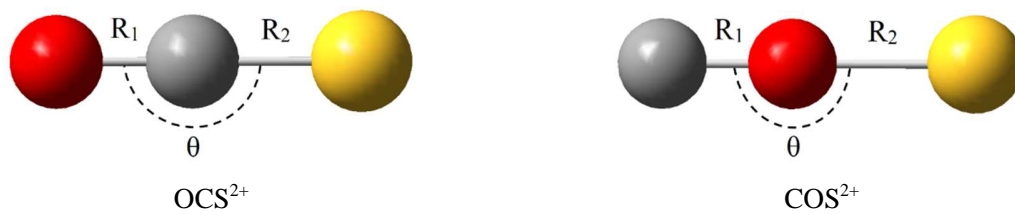

**Figure S2:**  $\text{OCS}^{2+}$  and  $\text{COS}^{2+}$  optimized structures and definition of their internal coordinates used for Table S1.



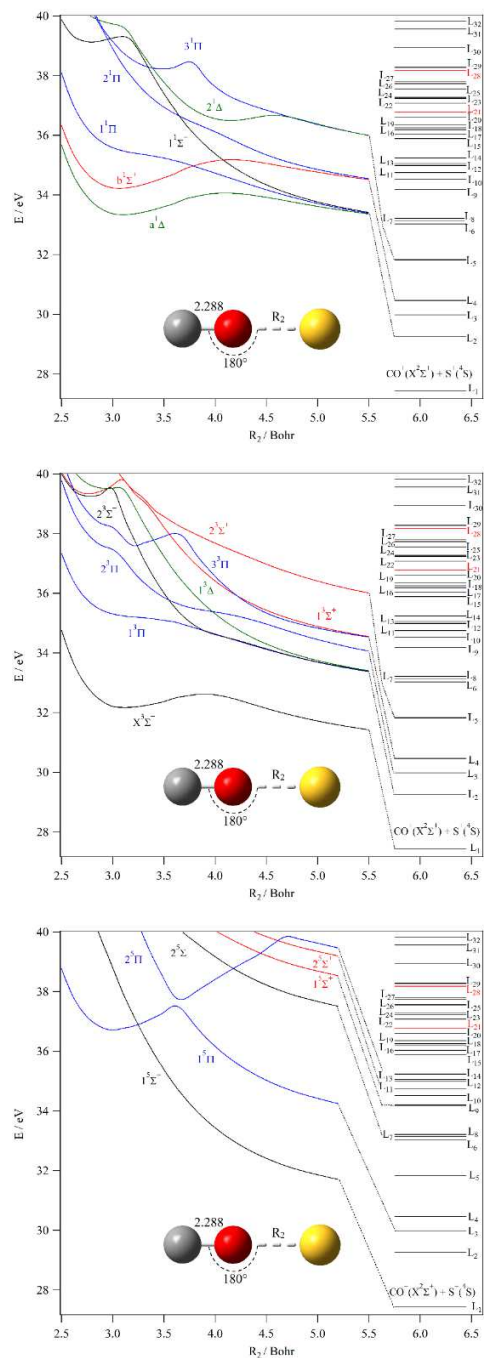

**Figure S3:** MRCI/aug-cc-pV(Q+d)Z potential energy curves of the singlet, triplet and quintet electronic states of  $\text{COS}^{2+}$  along the along the SO ( $R_2$ ) coordinate. The remaining internal coordinates are kept fixed at their values in the  $\text{COS}^{2+} (X^3\Sigma^-)$  state i.e.,  $R_1 = 2.288$  Bohr and  $\theta = 180^\circ$ .

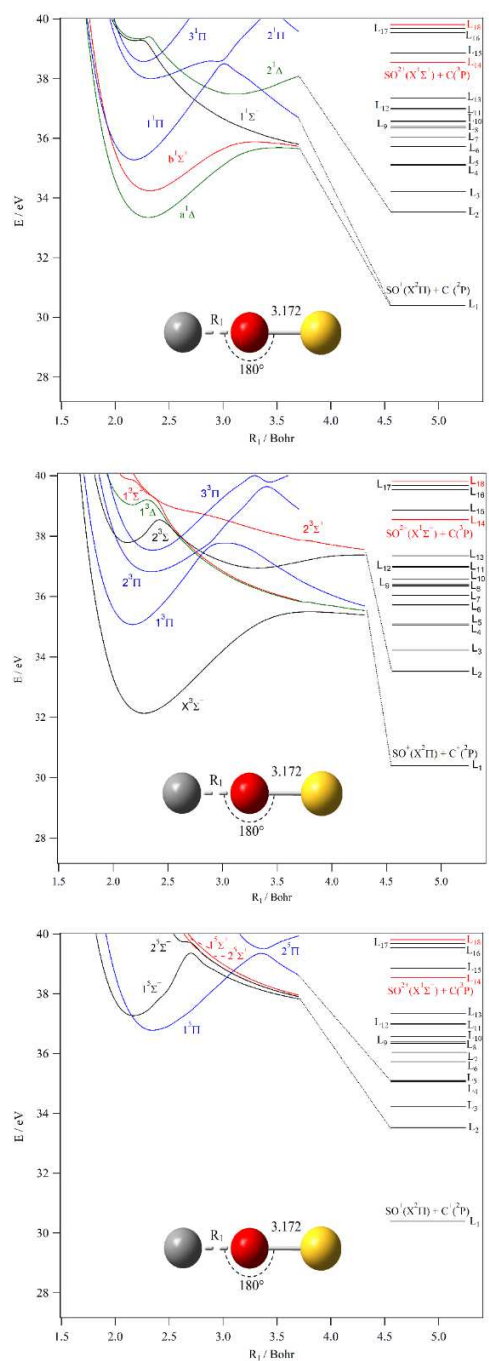

**Figure S4:** MRCI/aug-cc-pV(Q+d)Z potential energy curves of the singlet, triplet and quintet electronic states of  $\text{COS}^{2+}$  along the along the CO ( $R_1$ ) coordinate. The remaining internal coordinates are kept fixed at their values in the  $\text{COS}^{2+}$  ( $X^3\Sigma^-$ ) state (i.e.,  $R_2= 3.172$  Bohr and  $\theta= 180^\circ$ ).

## References

---

- <sup>1</sup> A. Ben Houria, Z. Ben Lakhdar, M. Hochlaf, F. Kemp, and I. R. McNab. *J. Chem. Phys.* 122, 054303 (2005).
- <sup>2</sup> A. Ben Houria, Z. Ben Lakhdar, and M. Hochlaf. *J. Chem. Phys.* 124, 054313 (2006).
- <sup>3</sup> <https://webbook.nist.gov>
- <sup>4</sup> D. Shi, W. Li, J. Sun, Z. Zhu, Y. Liu. *Comput. Theor. Chem.* 978, 126 (2011).
